# Supplementary material for: Water-soluble polymers with aggregation-induced emission and ultra-long room temperature phosphorescence
Source: Royal Society of Chemistry journal article supplement (doi:10.1039/d3py00138e), 2023-01-01
Supplement: d3py00138e1.pdf [file d3py00138e1.pdf]

## Supporting Information

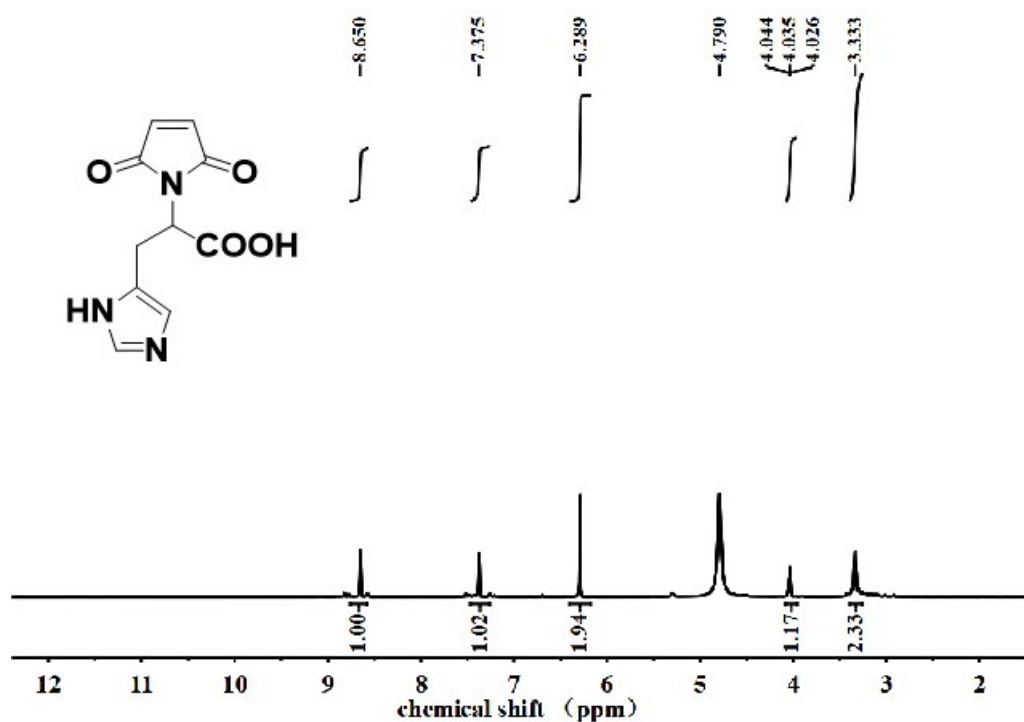

Figure S1. <sup>1</sup>H NMR spectra of compound HMI in D<sub>2</sub>O.

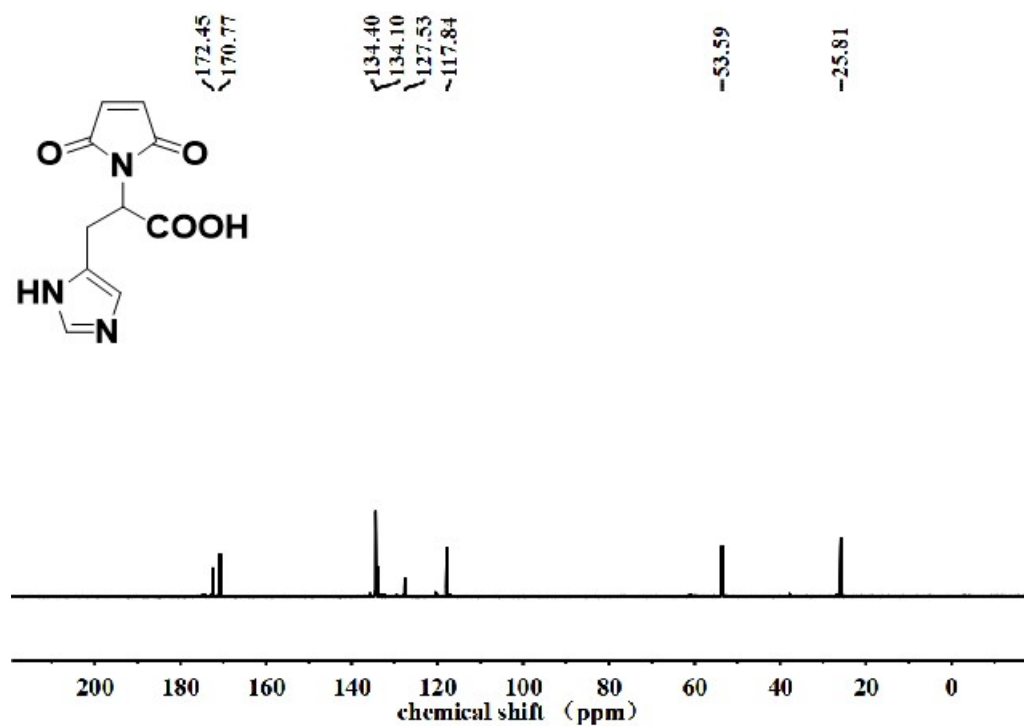

Figure S2. <sup>13</sup>C NMR spectra of compound HMI in D<sub>2</sub>O.

## Mass Spectrum SmartFormula Report

|                       |                                   |                                    |           |                  |           |
|-----------------------|-----------------------------------|------------------------------------|-----------|------------------|-----------|
| Analysis Info         |                                   | Acquisition Date 2022/7/7 12:07:03 |           |                  |           |
| Analysis Name         | C:\Users\breeze\Desktop\zqb-002.d | Operator                           | Demo User |                  |           |
| Method                | DirectInfusion - MS - positive.m  | Instrument                         | impact II | 1825265.10221    |           |
| Sample Name           |                                   |                                    |           |                  |           |
| Comment               |                                   |                                    |           |                  |           |
| Acquisition Parameter |                                   |                                    |           |                  |           |
| Source Type           | ESI                               | Ion Polarity                       | Negative  | Set Nebulizer    | 0.4 Bar   |
| Focus                 | Active                            | Set Capillary                      | 3000 V    | Set Dry Heater   | 180 °C    |
| Scan Begin            | 50 m/z                            | Set End Plate Offset               | -500 V    | Set Dry Gas      | 4.0 l/min |
| Scan End              | 1300 m/z                          | Set Charging Voltage               | 2000 V    | Set Divert Valve | Source    |
|                       |                                   | Set Corona                         | 0 nA      | Set APCI Heater  | 0 °C      |

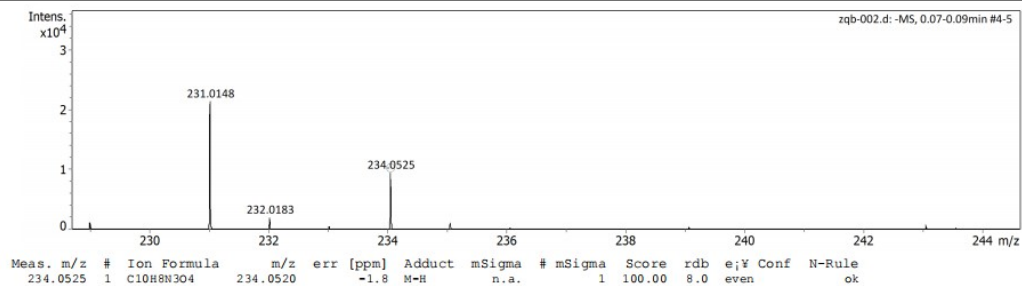

Figure S3. TOF-MS spectra of HMI

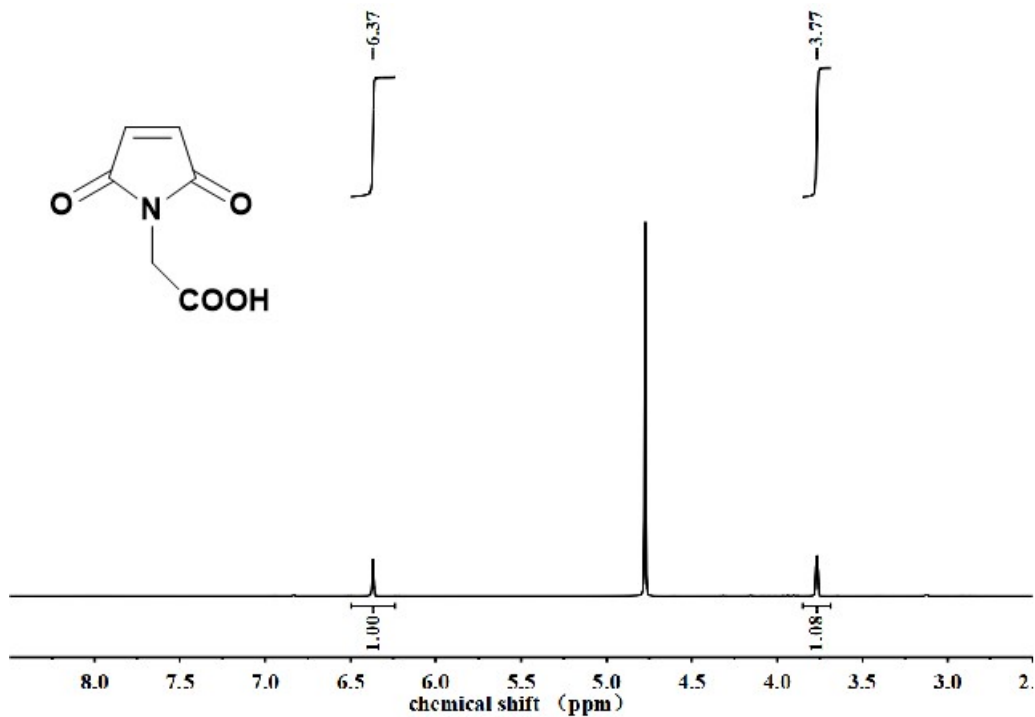

Figure S4. <sup>1</sup>H NMR spectra of compound GMI in D<sub>2</sub>O

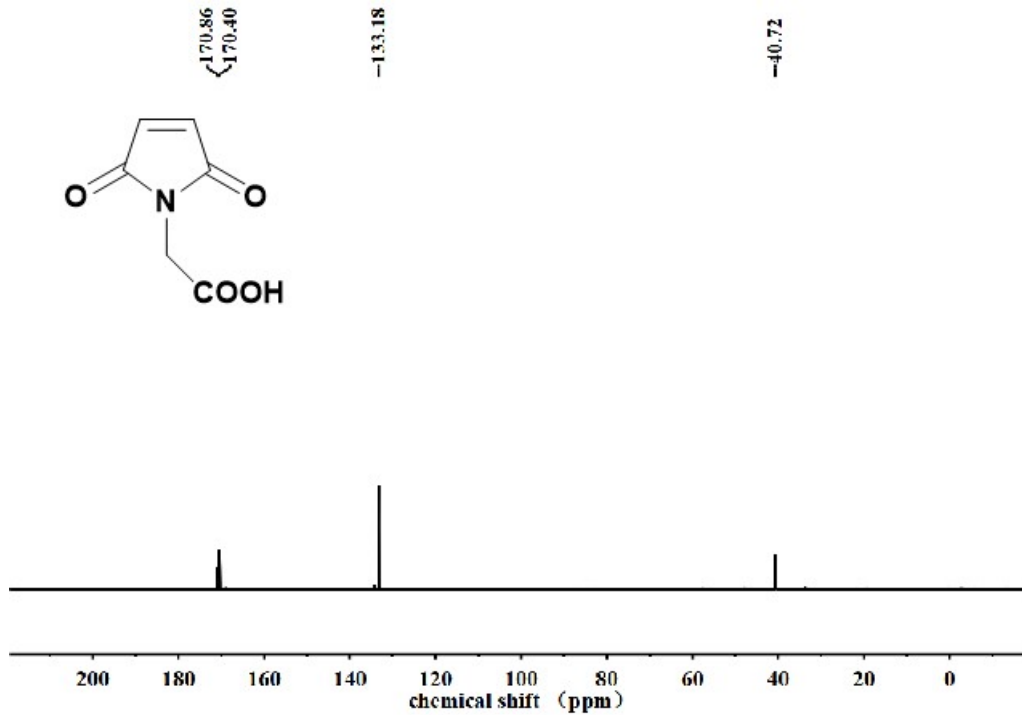

Figure S5.  $^{13}\text{C}$  NMR spectra of GMI in  $\text{D}_2\text{O}$ .

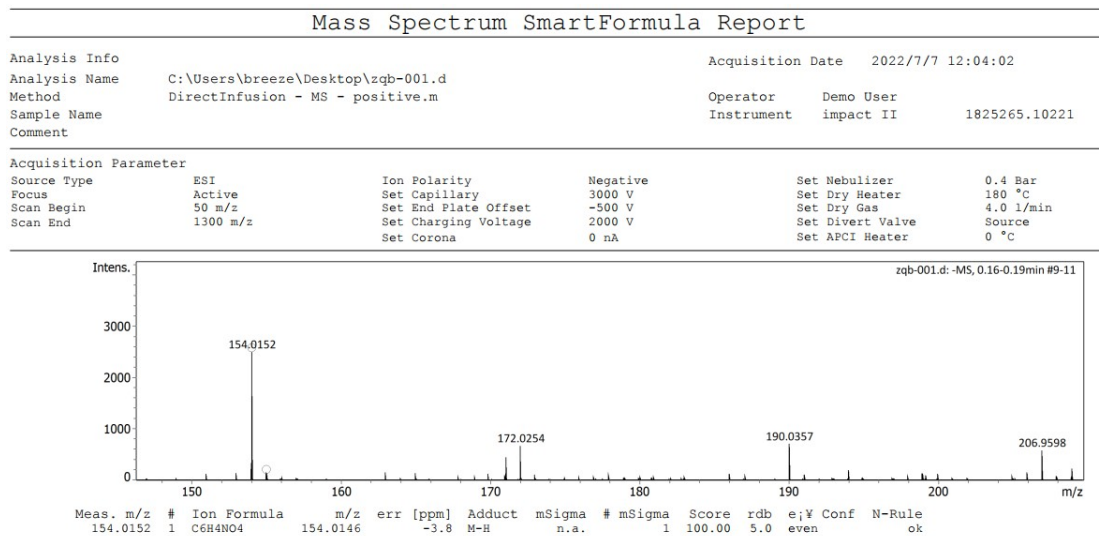

Figure S6. TOF-MS spectra of GMI

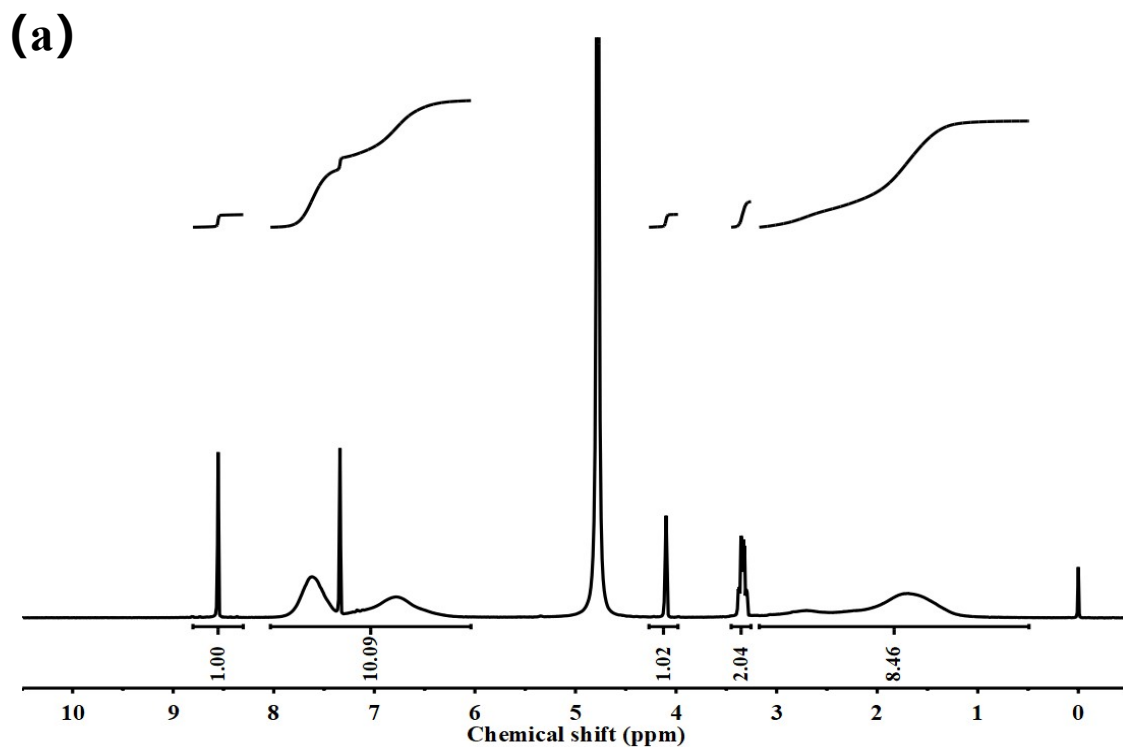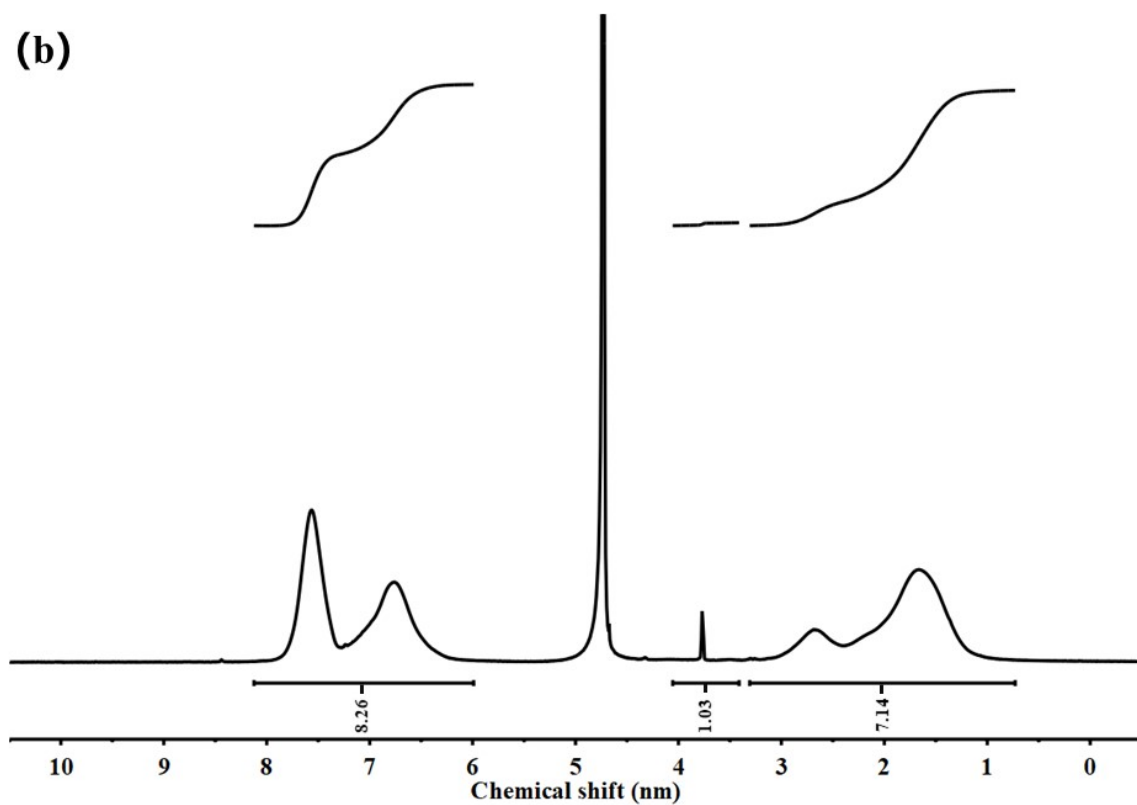

Figure S7.  $^1\text{H}$  NMR spectra of compound P1 (a) and P2 (b) in  $\text{D}_2\text{O}$ .

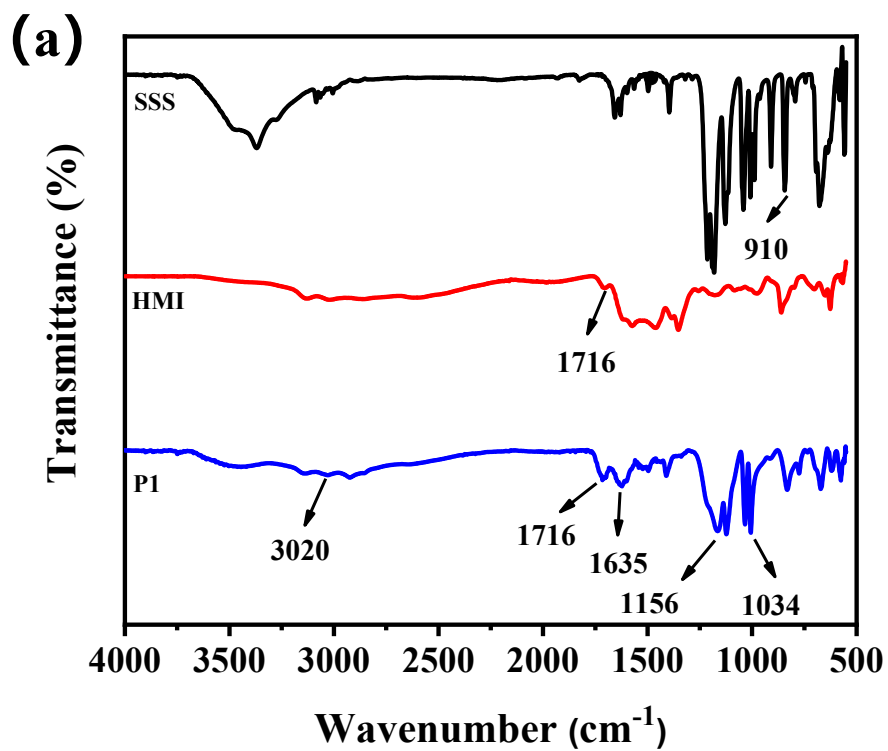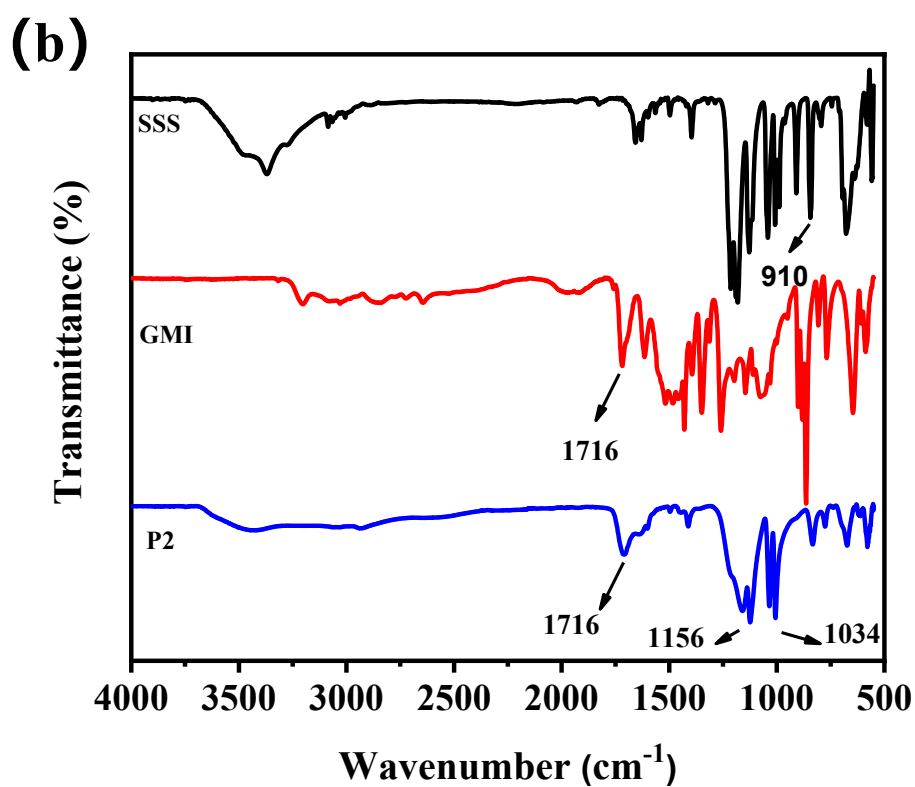

Figure S8. Typical FT-IR spectra of SSS, HMI and copolymers P1 (a); SSS, GMI and copolymers P2 (b).

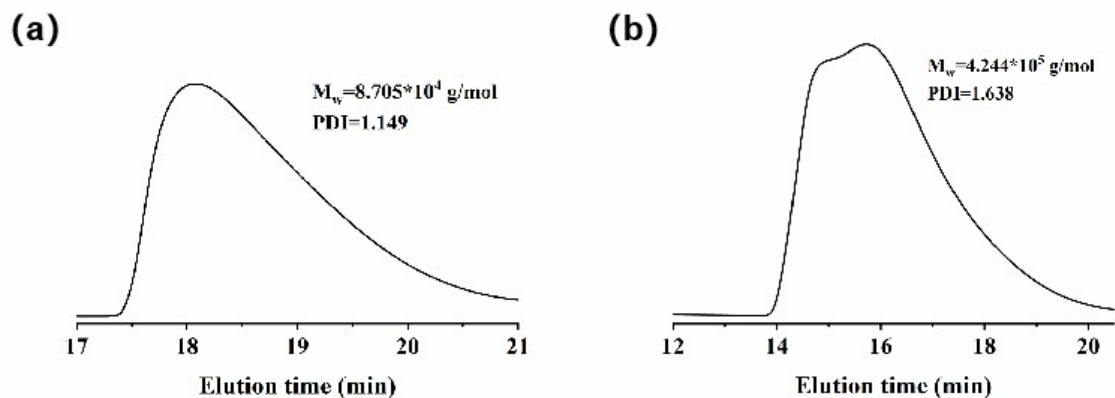

Figure S9. (a) GPC trace of P1 and (b) P2.

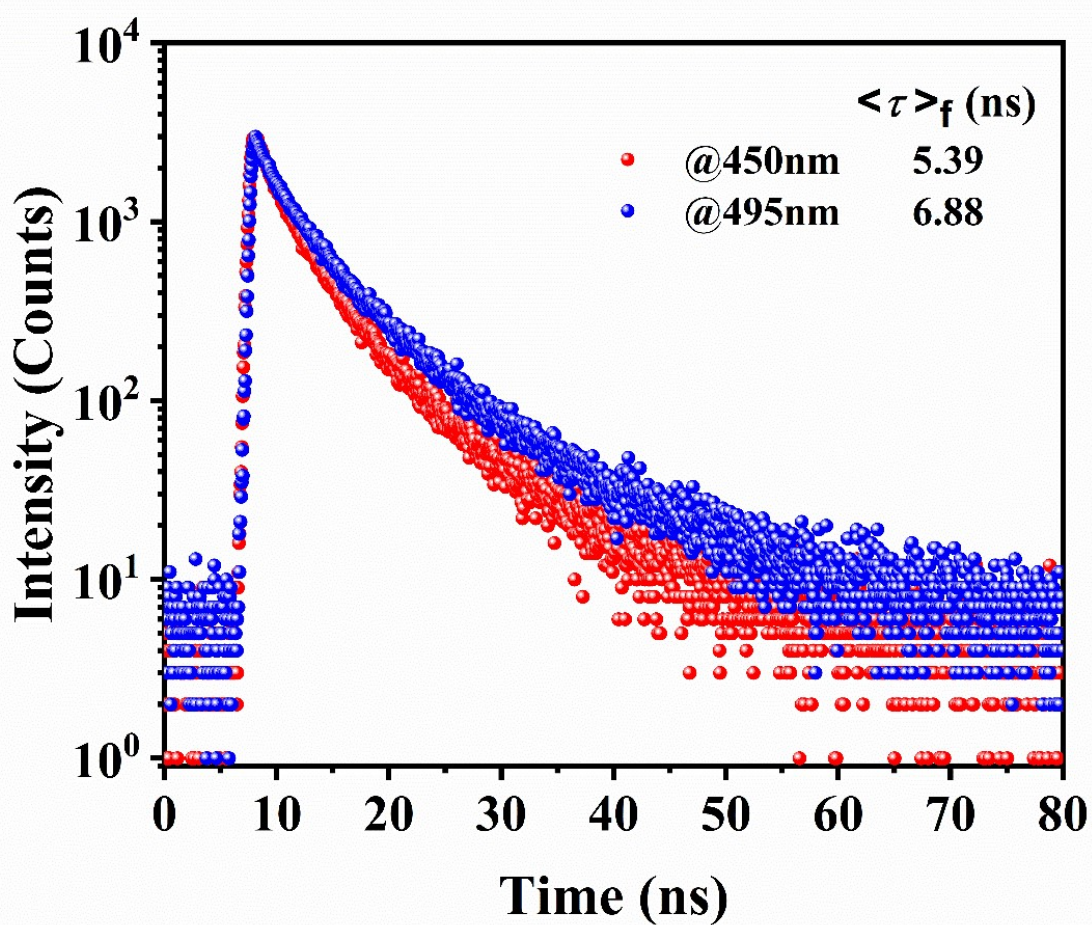

Figure S10. Fluorescence lifetimes measured at 450 and 495 nm ( $\lambda_{\text{ex}} = 365$  nm) for P1 solid powder.

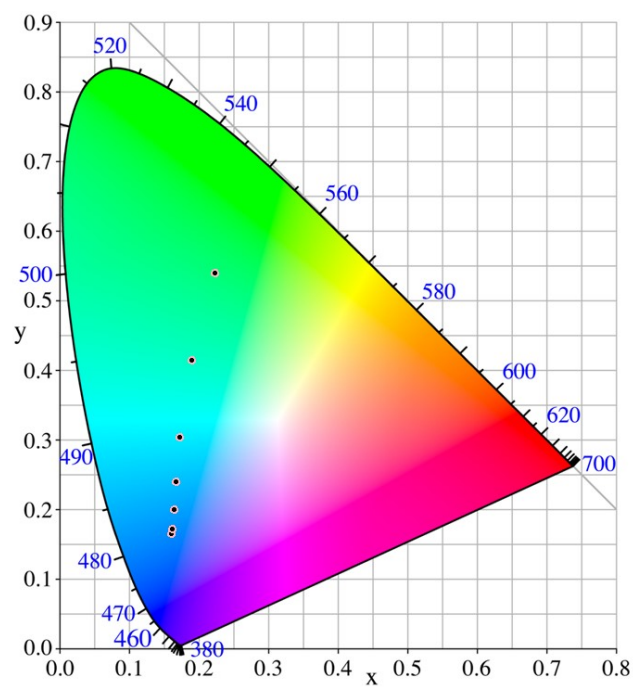

Figure S11. CIE coordinates of P1 powder fluorescence emission with different excitation wavelengths.

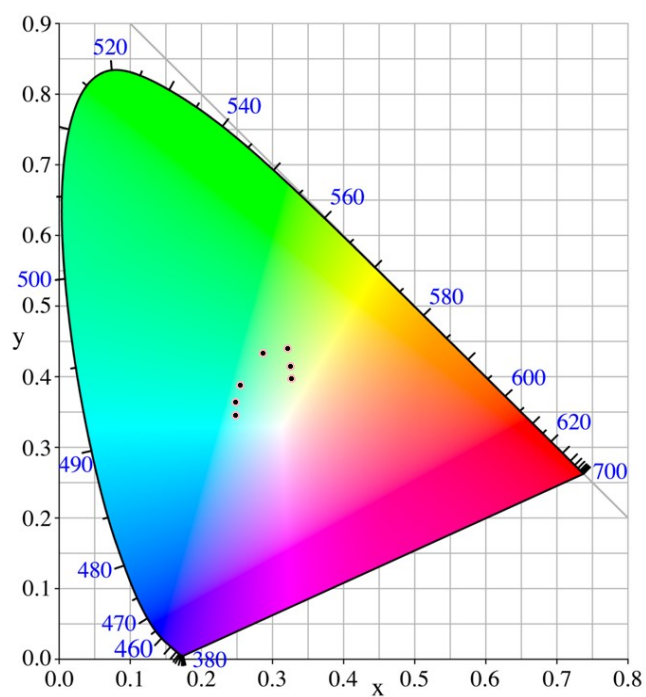

Figure S12. CIE coordinates of P1 powder phosphorescence emission with different excitation wavelengths.

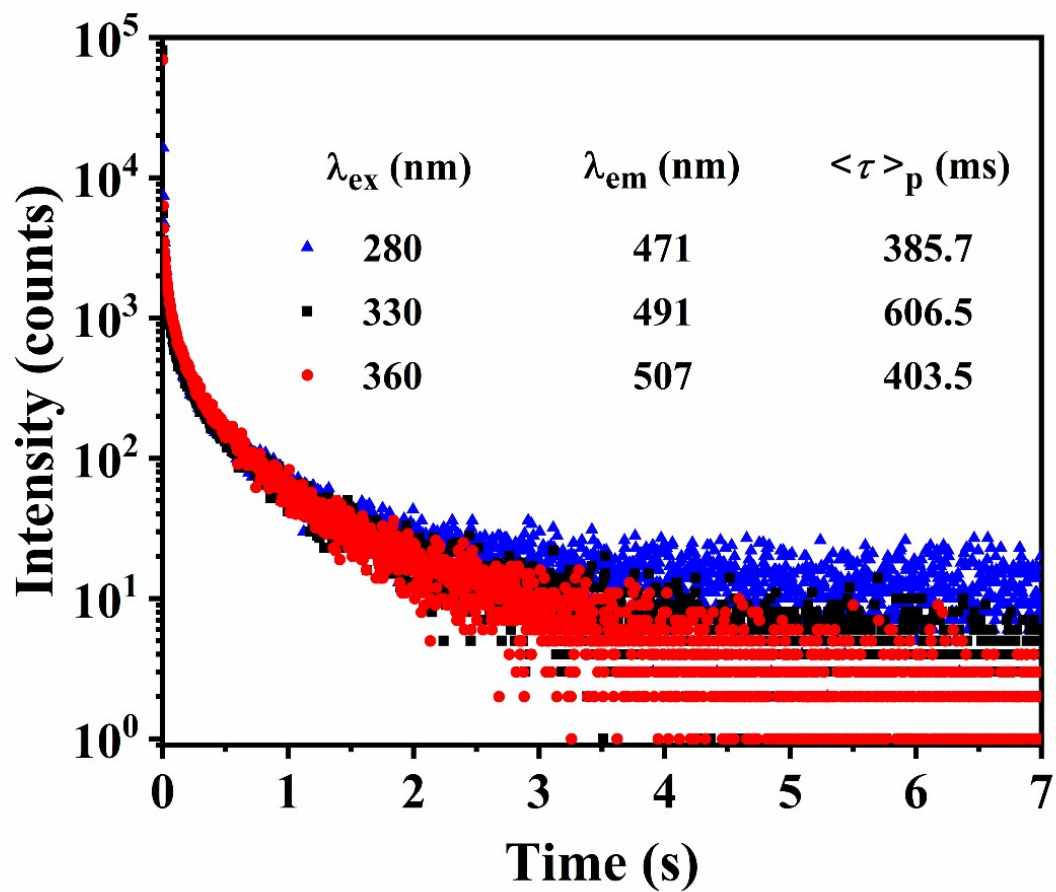

Figure 13. RTP lifetime profiles of P1



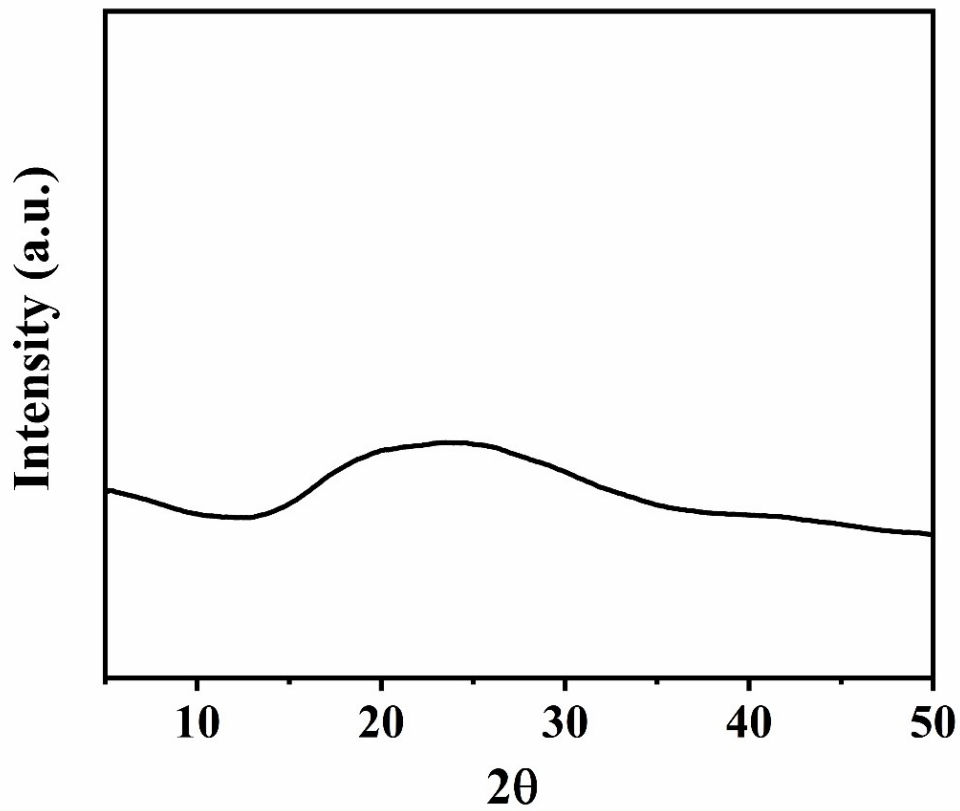

Figure S14. XRD patterns of P1.

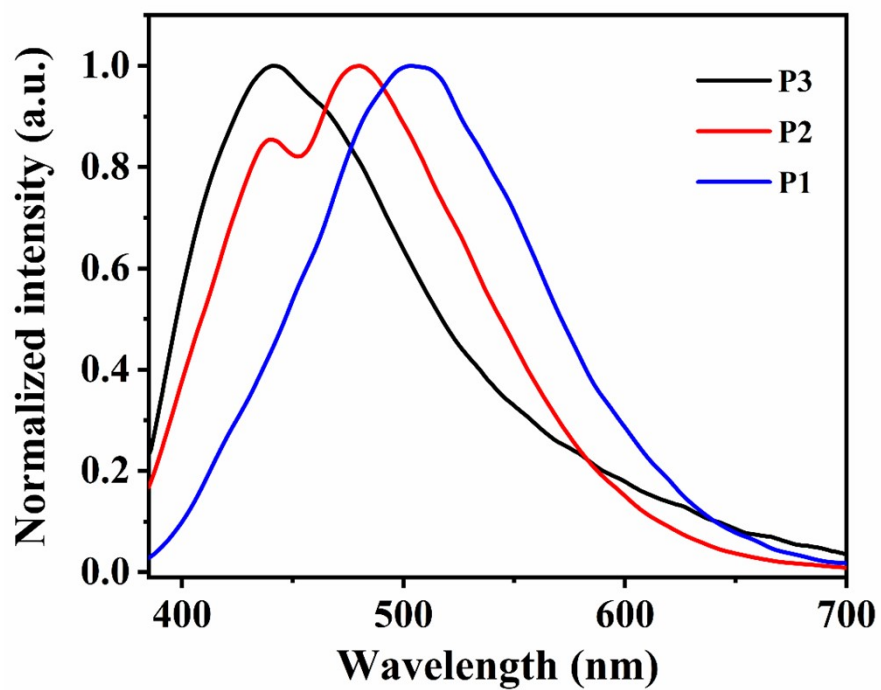

Figure S15. phosphorescence emission spectra of P1, P2, and P3.

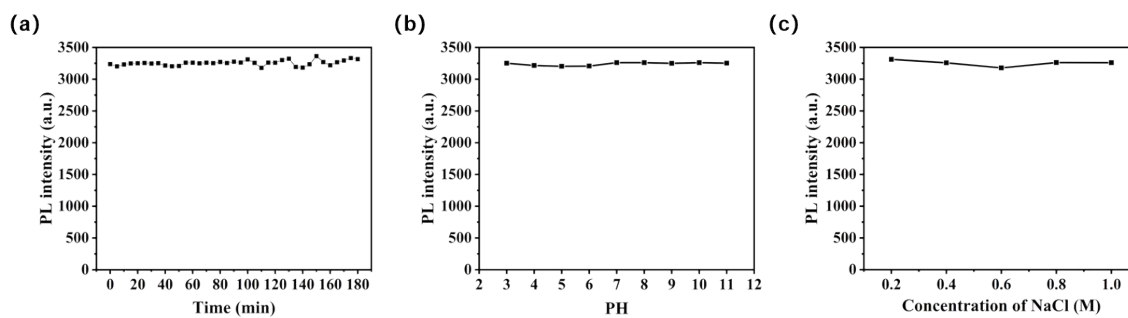

Figure S16. Stability research of polymer P1 in the (a) 365 nm UV irradiation time, (b) PH value, (c) ionic strength.

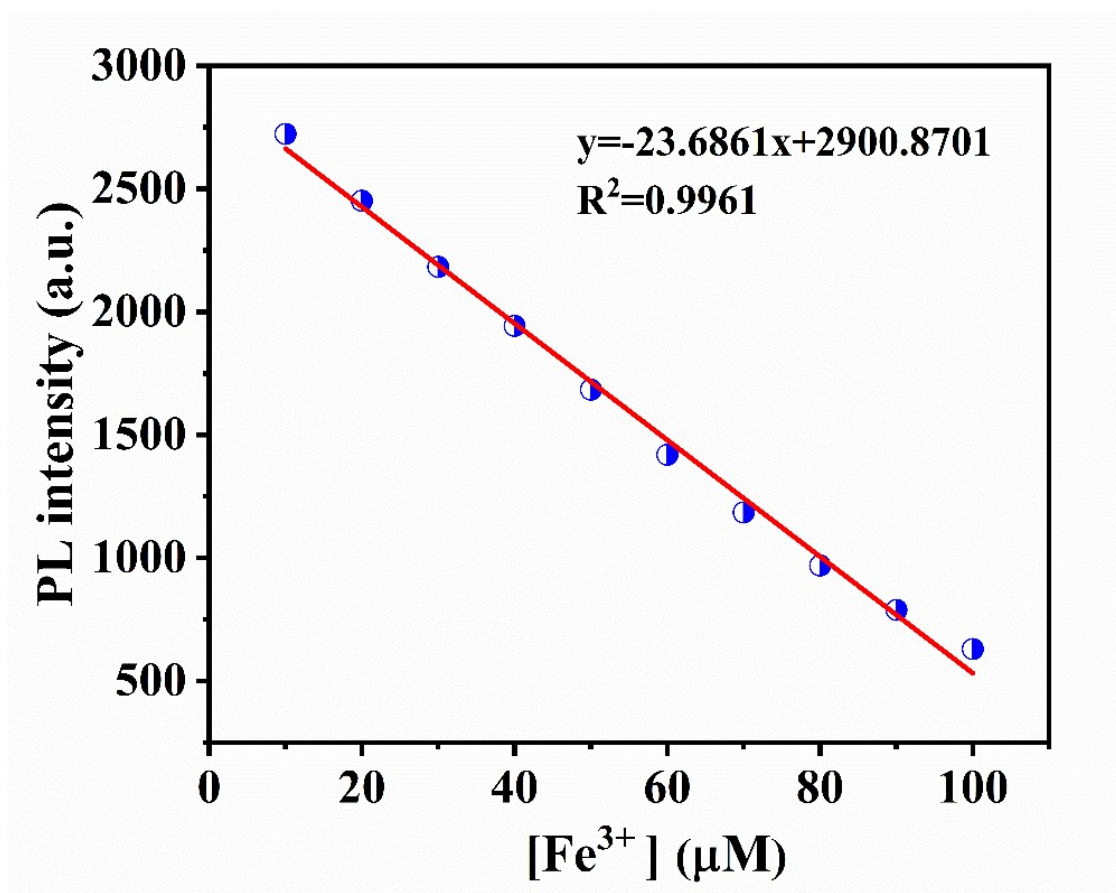

Figure S17. Relationship between the emission intensity of P1 (20 mg/mL) and  $\text{Fe}^{3+}$  - ion concentration.

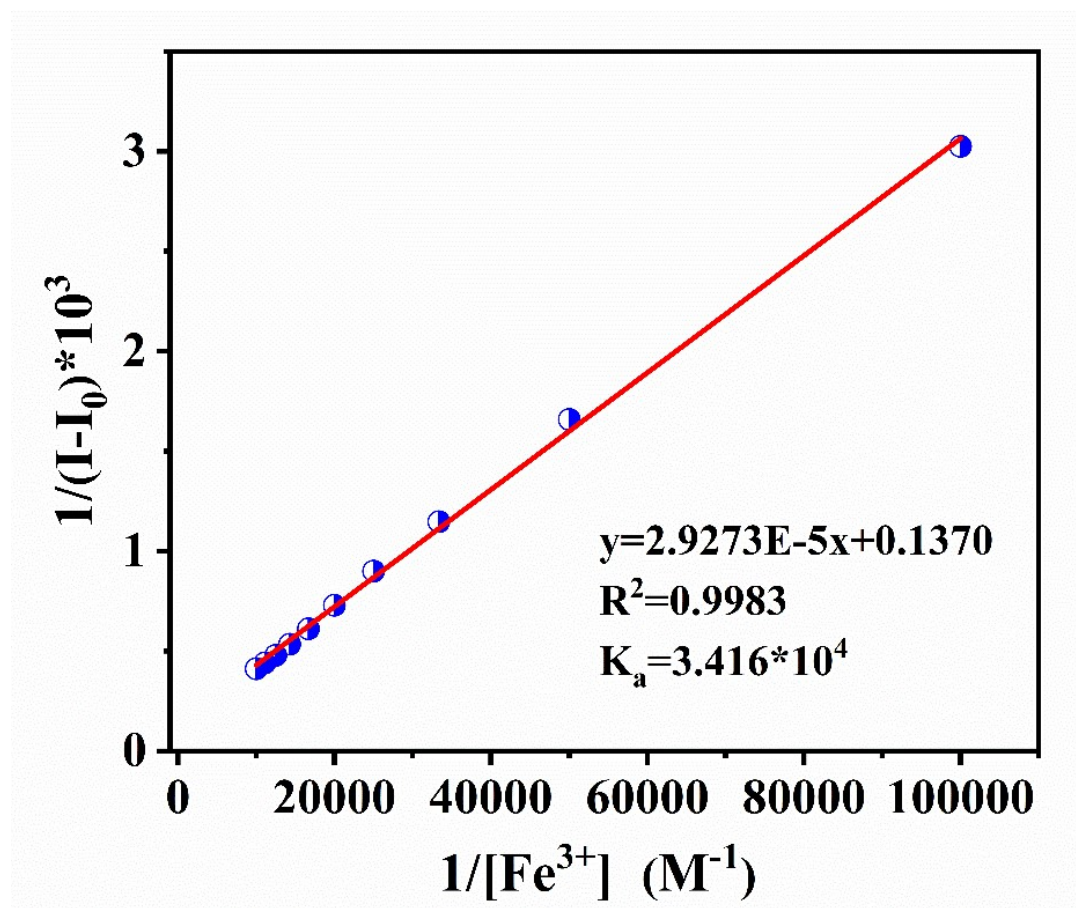

Figure S18. Benesi-Hildebrand plot for the 1:1 stoichiometric complex between of P1 solutions with  $\text{Fe}^{3+}$ .

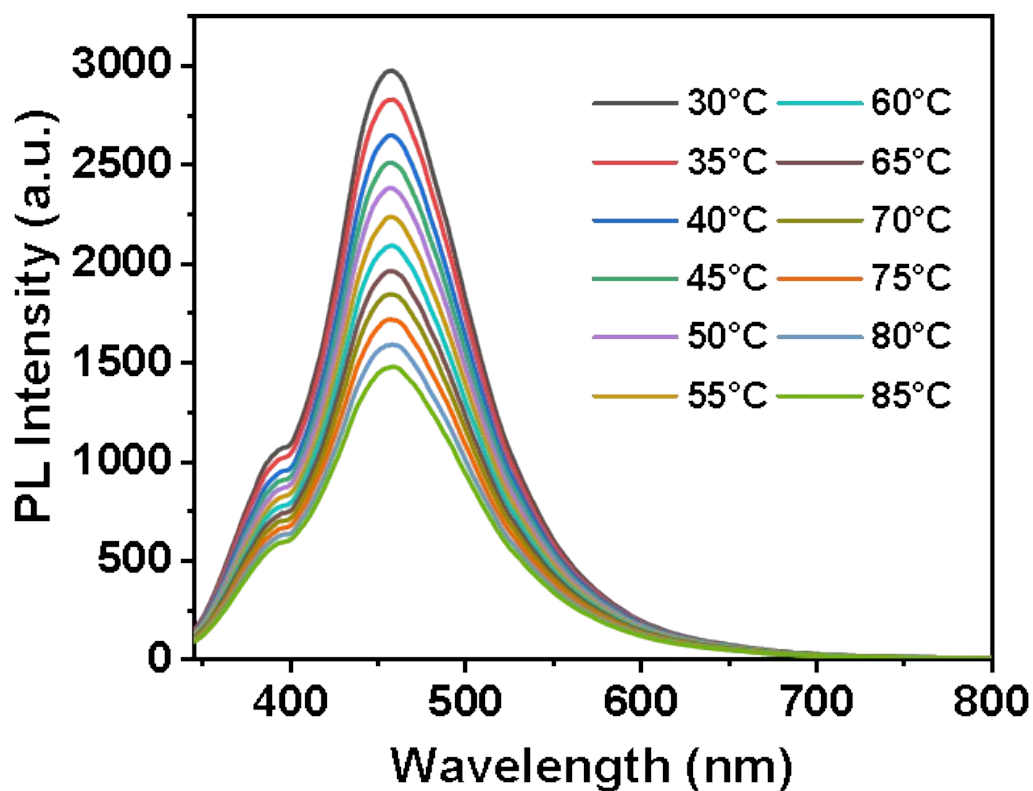

Figure S19. PL spectra of P1 solutions with different temperature

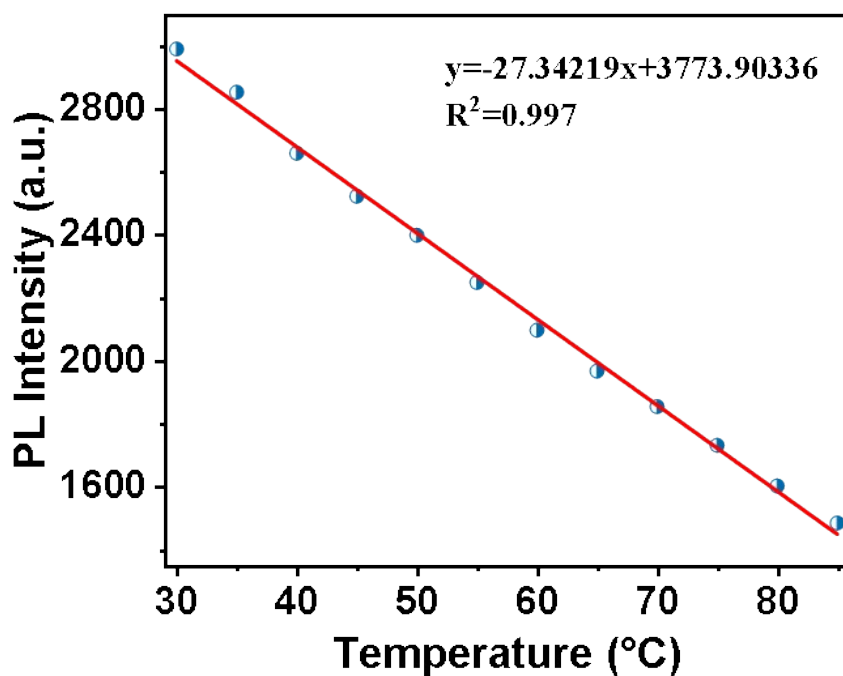

Figure S20. The linear relationship between the emission intensity of P1 and temperature.
